# Supplementary material for: The Organotypic Longitudinal Spinal Cord Slice Culture for Stem Cell Study
Source: Hindawi journal article supplement (doi:10.1155/2015/471216), 2015-01-01

**Ki67 / GFAP**

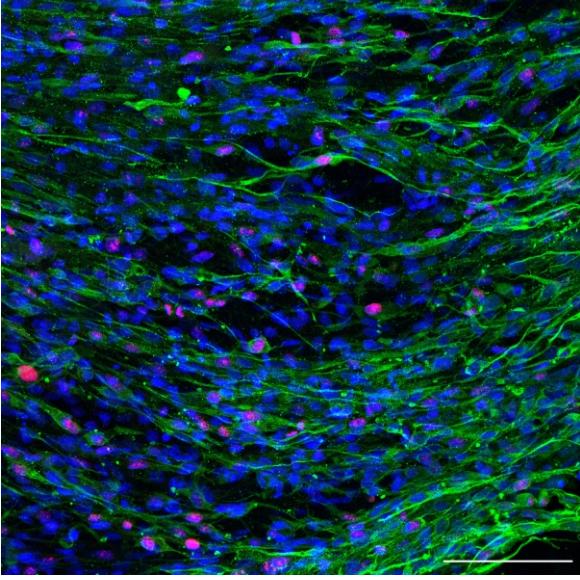

**III tubulin**

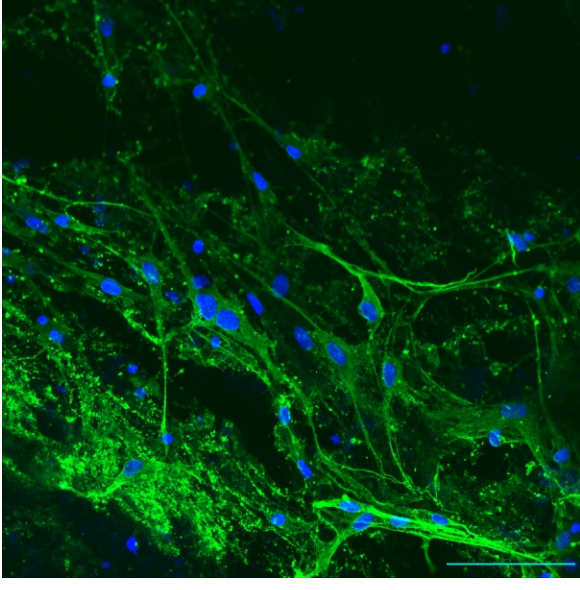

**NG2**

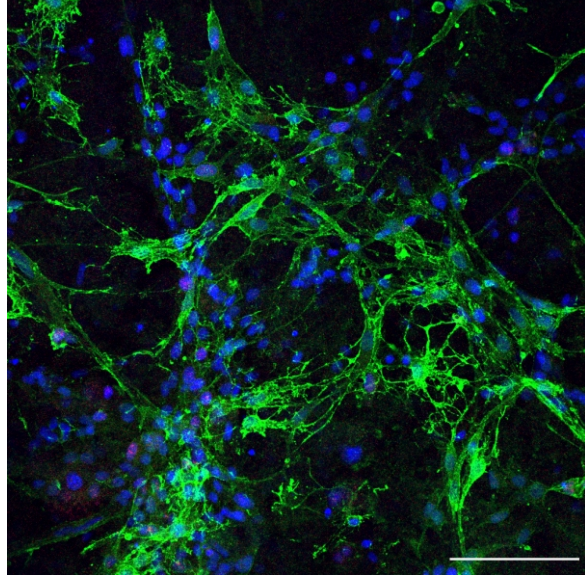

**GFAP / III tubulin**

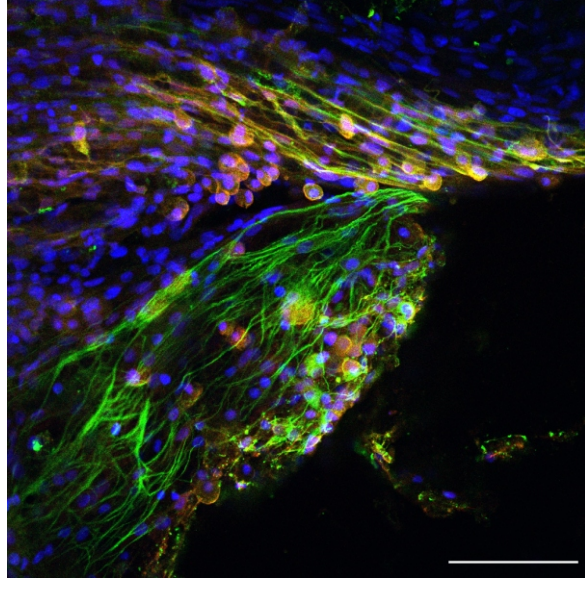

Supplement: f1 [file 471216.f1.pdf]
